# Supplementary material for: The burden of endometriosis on quality of life in Danish blood donors
Source: Research Square preprint supplement (doi:10.21203/rs.3.rs-6620337/v1), 2025-06-05
Supplement: Supplementary file 1 [file 29517e7637f8b06983aef4bc.xlsx]

## Sheet: Ark1
TABLE 2.
BMI	Hvad vejer du (ca.)?	What is your weight (approx.)?
BMI/height	Hvor høj er du?	What is your height?
Waist	Hvad er dit taljemål eller livvidde målt ud for navlen?	What is your waist measurement measured at the level of your navel?
Smoking	Ryger du? (gælder ikke E-cigaretter)	Do you smoke? (does not apply to e-cigarettes)
Smoking childhood home	Blev der røget i dit barndomshjem?	Was there smoking in your childhood home?
TABLE 4
Age of menarche	Hvor gammel var du, da dine menstruationer begyndte?	How old were you when your periods started?
menstrual cycle length	Hvor mange dage varer dine menstruationer vanligvis?	How many days do your periods usually last?
Age of menopause	Hvor gammel var du, da dine menstruationer holdt op?	How old were you when your periods stopped?
Age of menopause	Ophørte de pga. medicin eller anden behandling?	Did they stop due to medication or other treatment?
Tried to conceive ≥6 months	Har du på noget tidspunkt forsøgt at blive gravid i mere end 6 måneder uden held?	Have you ever tried to get pregnant for more than 6 months without success?
Have been pregnant	Har du haft en graviditet på mere end 3 måneder?	Have you had a pregnancy lasting more than 3 months?
Nausea during pregnancy	Har du oplevet kvalme i graviditeten?	Did you experience nausea during pregnancy?
TABLE 5
defaecation pattern regularity	Har du haft regelmæssig afføring (generelt ensartet hyppighed og konsistens af din afføring) indenfor de sidste 4 uger?	Have you had regular bowel movements (generally consistent frequency and consistency of your stool) within the last 4 weeks?
		Within the last 4 weeks, have you had any of the following stomach or digestive problems?
bloating	Indenfor de sidste 4 uger, har du så haft følgende problemer med maven eller fordøjelsen? [Oppustet?]	Bloating
abdominal rumbling	Indenfor de sidste 4 uger, har du så haft følgende problemer med maven eller fordøjelsen? [Rumlen i maven?]	Abdominal rumbling
acid regurgitation	Indenfor de sidste 4 uger, har du så haft følgende problemer med maven eller fordøjelsen? [Sure opstød?]	Acid regurgitation
heartburn	Indenfor de sidste 4 uger, har du så haft følgende problemer med maven eller fordøjelsen? [Halsbrand?]	Heartburn
lack of appetite	Indenfor de sidste 4 uger, har du så haft følgende problemer med maven eller fordøjelsen? [Manglende appetit?]	Lack of appetite
nausea	Indenfor de sidste 4 uger, har du så haft følgende problemer med maven eller fordøjelsen? [Kvalme?]	Nausea
vomitting	Indenfor de sidste 4 uger, har du så haft følgende problemer med maven eller fordøjelsen? [Opkastning?]	Vomiting
abdominal pain	Indenfor de sidste 4 uger, har du så haft følgende problemer med maven eller fordøjelsen? [Smerter i maven?]	Abdominal pain
pain during food intake	Indenfor de sidste 4 uger, har du så haft følgende problemer med maven eller fordøjelsen? [Smerter når du spiser?]	Pain during food intake
postprandial pain	Indenfor de sidste 4 uger, har du så haft følgende problemer med maven eller fordøjelsen? [Smerter efter du har spist]	Postprandial pain
defaecation pain	Indenfor de sidste 4 uger, har du så haft følgende problemer med maven eller fordøjelsen? [Smerter når du har afføring?]	Defaecation pain
diarrhoea	Indenfor de sidste 4 uger, har du så haft følgende problemer med maven eller fordøjelsen? [Diarré ?]	Diarrhoea
constipation	Indenfor de sidste 4 uger, har du så haft følgende problemer med maven eller fordøjelsen? [Forstoppelse?]	Constipation
irritable bowel syndrome	Har du nogensinde haft: [Irritabel tyktarm?]	Irritable bowel syndrome
lactose intolerance	Har du nogensinde haft: [Laktoseintolerans (mælkesukkerintolerans)?]	Lactose intolerance
gluten intolerance	Har du nogensinde haft: [Glutenintolerans (cøliaki)?]	Gluten intolerance (celiac disease)
TABLE 6
		Within the last 3 months, how often have you:
insomnia	De følgende spørgsmål afklarer, om du oplever problemer med din nattesøvn. Indenfor de sidste 3 måneder, hvor ofte har du haft: - problem med at falde i søvn inden 30 min	had problems falling asleep within 30 minutes?
insomnia	De følgende spørgsmål afklarer, om du oplever problemer med din nattesøvn. Indenfor de sidste 3 måneder, hvor ofte har du haft: - vågnet for tidligt uden at kunne falde i søvn igen	Woken up too early and been unable to fall asleep again?
insomnia	De følgende spørgsmål afklarer, om du oplever problemer med din nattesøvn. Indenfor de sidste 3 måneder, hvor ofte har du haft: - vågnet om natten eller tidlig morgen	Woken up during the night or early morning?
daytime fatigue	Indenfor de sidste 3 måneder, hvor ofte har du: - følt dig ekstremt træt i løbet af dagen?	Felt extremely tired during the day?
daytime fatigue	Indenfor de sidste 3 måneder, hvor ofte har du: - har du været plaget af en uimodståelig søvntrang på arbejde eller i skole?	Been affected by an irresistible urge to sleep at work or school?
daytime fatigue	Indenfor de sidste 3 måneder, hvor ofte har du: - har du været plaget af en uimodståelig søvntrang i din fritid?	Been affected by an irresistible urge to sleep during your spare time?
restless legs	Indenfor de sidste 3 måneder, hvor ofte har du: - haft uro eller ubehag i dine ben?	Experienced restlessness or discomfort in your legs?
TABLE 7
SF-12	De følgende spørgsmål handler om din opfattelse af dit helbred: Hvordan synes du dit helbred er alt i alt?	How would you rate your overall health?
		The following questions are about daily activities. Are you limited in these activities because of your health? If so, how much?
SF-12	De følgende spørgsmål handler om aktiviteter i dagligdagen. Er du på grund af dit helbred begrænset i disse aktiviteter? I så fald hvor meget? - Lettere aktiviteter, såsom at flytte et bord, støvsuge eller cykle	Light activities such as moving a table, vacuuming, or cycling?
SF-12	De følgende spørgsmål handler om aktiviteter i dagligdagen. Er du på grund af dit helbred begrænset i disse aktiviteter? I så fald hvor meget? - At gå flere etager op ad trapper	Climbing several flights of stairs?
		In the past 4 weeks, have you had any of the following problems with your work or other daily activities due to your physical health?
SF-12	Har du inden for de sidste 4 uger haft nogen af følgende problemer med dit arbejde eller andre daglige aktiviteter på grund af dit fysiske helbred? - Jeg har nået mindre, end jeg gerne ville	I accomplished less than I would have liked.
SF-12	Har du inden for de sidste 4 uger haft nogen af følgende problemer med dit arbejde eller andre daglige aktiviteter på grund af dit fysiske helbred? - Jeg har været begrænset i hvilken slags arbejde eller andre aktiviteter, jeg har kunnet udføre	I was limited in the kind of work or other activities I could perform.
		In the past 4 weeks, have you had any of the following problems with your work or other daily activities due to emotional problems?
SF-12	Har du inden for de seneste 4 uger haft nogen af følgende problemer med dit arbejde eller andre daglige aktiviteter på grund af følelsesmæssige problemer? - Jeg har nået mindre, end jeg gerne ville	I accomplished less than I would have liked.
SF-12	Har du inden for de seneste 4 uger haft nogen af følgende problemer med dit arbejde eller andre daglige aktiviteter på grund af følelsesmæssige problemer? - Jeg har udført mit arbejde eller andre aktiviteter mindre omhyggeligt, end jeg plejer	I worked or performed activities less carefully than usual.
SF-12	Inden for de sidste 4 uger, hvor meget har fysisk smerte vanskeliggjort dit daglige arbejde (både arbejde uden for hjemmet og husarbejde)?	In the past 4 weeks, how much has physical pain interfered with your normal work (both work outside the home and housework)?
		These questions are about how you have felt during the past 4 weeks. During the past 4 weeks, how much of the time have you...
SF-12	Disse spørgsmål handler om, hvordan du har haft det i de sidste 4 uger. Hvor stor en del af tiden de sidste 4 uger har du... - ...følt dig rolig og afslappet?	...felt calm and relaxed?
SF-12	Disse spørgsmål handler om, hvordan du har haft det i de sidste 4 uger. Hvor stor en del af tiden de sidste 4 uger har du... - ...været fuld af energi?	...felt full of energy?
SF-12	Disse spørgsmål handler om, hvordan du har haft det i de sidste 4 uger. Hvor stor en del af tiden de sidste 4 uger har du... - ...følt dig trist til mode?	...felt downhearted or blue?
SF-12	Inden for de sidste 4 uger, hvor stor en del af tiden har dit fysiske helbred eller følelsesmæssige problemer gjort det vanskeligt at se andre mennesker (fx. besøge venner, slægtninge osv.)?	In the past 4 weeks, how much of the time has your physical health or emotional problems made it difficult to see other people (e.g., visit friends, relatives, etc.)?
		These questions concern your feelings and thoughts over the past 4 weeks. For each question, please indicate how often you felt or thought that way.
perceived stress	Spørgsmålene drejer sig om dine følelser og tanker inden for de seneste 4 uger.Hvor ofte inden for de seneste 4 uger: - Er du blevet oprevet over noget, der skete uventet?	Been upset because something unexpected happened?
perceived stress	Spørgsmålene drejer sig om dine følelser og tanker inden for de seneste 4 uger. Hvor ofte inden for de seneste 4 uger: - Har du følt, at du ikke kunne kontrollere de betydningsfulde ting i dit liv?	Felt that you were unable to control the important things in your life?
perceived stress	Spørgsmålene drejer sig om dine følelser og tanker inden for de seneste 4 uger. Hvor ofte inden for de seneste 4 uger: - Har du følt dig nervøs og "stresset"?	Felt nervous and “stressed”?
perceived stress	Hvor ofte inden for de seneste 4 uger: - Har du følt dig sikker på din evne til at klare dine personlige problemer?	Felt confident about your ability to handle your personal problems?
perceived stress	Hvor ofte inden for de seneste 4 uger: - Har du følt, at tingene gik, som du gerne ville have det?	Felt that things were going your way?
perceived stress	Hvor ofte inden for de seneste 4 uger: - Har du følt, at du ikke kunne overkomme alle de ting, du skulle?	Felt that you could not cope with all the things you had to do?
perceived stress	Hvor ofte inden for de seneste 4 uger: - Har du været i stand til at håndtere dagligdags irritationsmomenter?	Been able to handle everyday irritations?
perceived stress	Hvor ofte inden for de seneste 4 uger: - Har du følt, at du havde styr på tingene?	Felt that you were on top of things?
perceived stress	Hvor ofte inden for de seneste 4 uger: - Er du blevet vred over ting, som du ikke havde indflydelse på?	Been angered by things that were outside of your control?
perceived stress	Hvor ofte inden for de seneste 4 uger: - Har du følt, at dine problemer hobede sig så meget op, at du ikke kunne klare dem?	Felt that difficulties were piling up so high that you could not overcome them?
Depression	Har du følt, at livet ikke var værd at leve?	Have you felt that life was not worth living?
Depression	Har du følt dig rastløs?	Have you felt restless?
Depression	Har du følt dig mere stille?	Have you felt more withdrawn or quiet?
Depression	Har du haft dårlig samvittighed eller skyldfølelse?	Have you felt guilt or a bad conscience?
		The following questions concern symptoms of depression and how you have been feeling over the last 2 weeks:
Depression	De følgende spørgsmål omhandler depressionssymptomer, og hvordan du har haft det gennem de sidste 2 uger - Har du følt dig trist til mode, ked af det?	Have you felt down, sad, or depressed?
Depression	De følgende spørgsmål omhandler depressionssymptomer, og hvordan du har haft det gennem de sidste 2 uger - Har du manglet interesse for dine daglige gøremål?	Have you lost interest in your daily activities?
Depression	De følgende spørgsmål omhandler depressionssymptomer, og hvordan du har haft det gennem de sidste 2 uger - Har du følt, du manglede energi og kræfter?	Have you felt a lack of energy or strength?
Depression	Har en læge nogensinde konstateret, at du havde en depression?	Has a doctor ever diagnosed you with depression?
Depression	Fik du medicinsk behandling?	Did you receive medical treatment?
Depression	Fik du anden behandling?	Did you receive other types of treatment?
Depression	Har du haft nedsat appetit?	Have you had a reduced appetite?
Depression	Har du haft øget appetit?	Have you had an increased appetite?
Depression	Har du haft besvær med at koncentrere dig, fx læse avis eller følge med i fjernsynet?	Have you had difficulty concentrating, for example reading a newspaper or following a TV program?
Depression	Har du haft besvær med at sove om natten?	Have you had trouble sleeping at night?
Depression	Har du haft mindre selvtillid?	Have you had lower self-esteem?
