# Supplementary material for: The burden of endometriosis on quality of life in Danish blood donors
Source: Research Square preprint supplement (doi:10.21203/rs.3.rs-6620337/v1), 2025-06-05
Supplement: Supplementary file 2 [file 71832f0dd334cfa88a2e7a8f.xlsx]

## Sheet: 2025 v2
n	Academic degrees	First name	Surname	Email	Affiliation 1	Affiliation 2	Banner
1	PhD	Jakob	Bay	jabay@regionsjaelland.dk	Department of Clinical Immunology, Zealand University Hospital, Køge, Denmark		DBDS GC (Banner)
2	PhD	Andrea	Barghetti	andrea.barghetti@regionh.dk	Department of Clinical Immunology, Copenhagen University Hospital, Rigshospitalet, Copenhagen, Denmark		DBDS GC (Banner)
3	PhD	Mette Skou	Bendtsen	mette.skou.bentsen@regionh.dk	Department of Clinical Immunology, Copenhagen University Hospital, Rigshospitalet, Copenhagen, Denmark		DBDS GC (Banner)
4	MSc	Jens Kjærgaard	Boldsen	jenbol@rm.dk	Department of Clinical Immunology, Aarhus University Hospital, Aarhus, Denmark		DBDS GC (Banner)
5	PhD	Søren	Brunak	soren.brunak@cpr.ku.dk	Novo Nordisk Foundation Center for Protein Research, Faculty of Health and Medical Sciences, University of Copenhagen, Copenhagen, Denmark		DBDS GC (Banner)
6	MD	Nanna	Brøns	nanna.broens@regionh.dk	Department of Clinical Immunology, Copenhagen University Hospital, Rigshospitalet, Copenhagen, Denmark		DBDS GC (Banner)
7	PhD	Alfonso	Buil Demur	alfonso.buil.demur@regionh.dk	Institute of Biological Psychiatry, Mental Health Centre, Sct. Hans, Copenhagen University Hospital, Roskilde, Denmark		DBDS GC (Banner)
8	MD	Johan Skov	Bundgaard	johan.skov.bundgaard@regionh.dk	Department of Clinical Immunology, Copenhagen University Hospital, Rigshospitalet, Copenhagen, Denmark		DBDS GC (Banner)
9	PhD	Lea Arregui Nordahl	Christoffersen	lea.arregui.nordahl.christoffersen@regionh.dk	Department of Clinical Immunology, Zealand University Hospital, Køge, Denmark		DBDS GC (Banner)
10	PhD	Maria	Didriksen	maria.didriksen@regionh.dk	Department of Clinical Immunology, Copenhagen University Hospital, Rigshospitalet, Copenhagen, Denmark		DBDS GC (Banner)
11	PhD	Khoa Manh	Dinh	khoadinh@rm.dk	Department of Clinical Immunology, Aarhus University Hospital, Aarhus, Denmark		DBDS GC (Banner)
12	PhD	Joseph	Dowsett	joseph.dowsett@regionh.dk	Department of Clinical Immunology, Copenhagen University Hospital, Rigshospitalet, Copenhagen, Denmark		DBDS GC (Banner)
13	PhD	Christian	Erikstrup	christian.erikstrup@skejby.rm.dk	Department of Clinical Immunology, Aarhus University Hospital, Aarhus, Denmark	Department of Clinical Medicine, Health, Aarhus University, Aarhus, Denmark	DBDS GC (Banner)
14	MSc	Josephine	Gladov	joglad@rm.dk	Department of Clinical Immunology, Aarhus University Hospital, Aarhus, Denmark	Department of Clinical Medicine, Health, Aarhus University, Aarhus, Denmark	DBDS GC (Banner)
15	PhD	Daniel	Gudbjartsson	Daniel.Gudbjartsson@decode.is	deCODE Genetics, Reykjavik, Iceland		DBDS GC (Banner)
16	PhD	Thomas Folkmann	Hansen	thomas.hansen@regionh.dk	Danish Headache Center, Department of Neurology, Copenhagen University Hospital, Rigshospitalet-Glostrup, Copenhagen, Denmark		DBDS GC (Banner)
17	PhD	Dorte	Helenius Mikkelsen	dorte.helenius.mikkelsen@regionh.dk	Institute of Biological Psychiatry, Mental Health Centre, Sct. Hans, Copenhagen University Hospital, Roskilde, Denmark		DBDS GC (Banner)
18	MSc	Lotte	Hindhede	LOTHIN@rm.dk	Department of Clinical Immunology, Aarhus University Hospital, Aarhus, Denmark		DBDS GC (Banner)
19	PhD	Henrik	Hjalgrim	HHJ@cancer.dk	Danish Cancer Society Research Center, Copenhagen, Denmark	Department of Epidemiology Research, Statens Serum Institut, Copenhagen, Denmark	DBDS GC (Banner)
20	PhD	Jakob	Hjorth von Stemann	jakob.hjorth.von.stemann@regionh.dk	Department of Clinical Immunology, Copenhagen University Hospital, Rigshospitalet, Copenhagen, Denmark		DBDS GC (Banner)
21	MD	Bitten Aagaard	Jensen	biaaj@rn.dk	Department of Clinical Immunology, Aalborg University Hospital, Aalborg, Denmark		DBDS GC (Banner)
22	PhD	Kathrine	Kaspersen	kathkasp@rm.dk	Department of Clinical Immunology, Aarhus University Hospital, Aarhus, Denmark		DBDS GC (Banner)
23	MSc	Bertram Dalskov	Kjerulff	berkje@rm.dk	Department of Clinical Immunology, Aarhus University Hospital, Aarhus, Denmark		DBDS GC (Banner)
24	MSc	Lisette	Kogelman	lisette.kogelman@regionh.dk	Danish Headache Center, Department of Neurology, Copenhagen University Hospital, Rigshospitalet-Glostrup, Copenhagen, Denmark		DBDS GC (Banner)
25	PhD	Mette	Kongstad	mette.kongstad.01@regionh.dk	Department of Clinical Immunology, Copenhagen University Hospital, Rigshospitalet, Copenhagen, Denmark		DBDS GC (Banner)
26	PhD	Susan	Mikkelsen	susanmke@rm.dk	Department of Clinical Immunology, Aarhus University Hospital, Aarhus, Denmark		DBDS GC (Banner)
27	MD	Christina	Mikkelsen	christina.mikkelsen@regionh.dk	Department of Clinical Immunology, Copenhagen University Hospital, Rigshospitalet, Copenhagen, Denmark		DBDS GC (Banner)
28	MSc	Line Hjorth Sjernholm	Nielsen	linen3@rm.dk	Department of Clinical Immunology, Aarhus University Hospital, Aarhus, Denmark	Department of Clinical Medicine, Health, Aarhus University, Aarhus, Denmark	DBDS GC (Banner)
29	PhD	Janna	Nissen	ioanna.nissen@regionh.dk	Department of Clinical Immunology, Copenhagen University Hospital, Rigshospitalet, Copenhagen, Denmark		DBDS GC (Banner)
30	PhD	Mette	Nyegaard	nyegaard@hst.aau.dk	Department of Health Science and Technology, Faculty of Medicine, Aalborg Univeristy, Aalborg, Denmark		DBDS GC (Banner)
31	DMSc	Sisse Rye	Ostrowski	sisse.rye.ostrowski@regionh.dk	Department of Clinical Immunology, Copenhagen University Hospital, Rigshospitalet, Copenhagen, Denmark	Department of Clinical Medicine, Faculty of Health and Medical Sciences, University of Copenhagen, Copenhagen, Denmark	DBDS GC (Banner)
32	MSc	Frederikke Byron	Pedersen	frederikke.byron.pedersen@regionh.dk	Department of Clinical Immunology, Copenhagen University Hospital, Rigshospitalet, Copenhagen, Denmark		DBDS GC (Banner)
33	PhD	Ole Birger	Pedersen	olbp@regionsjaelland.dk	Department of Clinical Immunology, Zealand University Hospital, Køge, Denmark	Department of Clinical Medicine, Faculty of Health and Medical Sciences, University of Copenhagen, Copenhagen, Denmark	DBDS GC (Banner)
34	PhD	Liam James Elgaard	Quinn	liaq@regionsjaelland.dk	Department of Clinical Immunology, Zealand University Hospital, Køge, Denmark		DBDS GC (Banner)
35	PhD	Þórunn	Rafnar	Thorunn.Rafnar@decode.is	deCODE Genetics, Reykjavik, Iceland		DBDS GC (Banner)
36	PhD	Palle Duun	Rohde	palledr@hst.aau.dk	Department of Health Science and Technology, Faculty of Medicine, Aalborg Univeristy, Aalborg, Denmark		DBDS GC (Banner)
37	PhD	Klaus	Rostgaard	klar@cancer.dk	Danish Cancer Society Research Center, Copenhagen, Denmark	Department of Epidemiology Research, Statens Serum Institut, Copenhagen, Denmark	DBDS GC (Banner)
38	PhD	Andrew Joseph	Schork	andrew.joseph.schork@regionh.dk	Institute of Biological Psychiatry, Mental Health Centre, Sct. Hans, Copenhagen University Hospital, Roskilde, Denmark		DBDS GC (Banner)
39	PhD	Michael	Schwinn	michael.schwinn@regionh.dk	Department of Clinical Immunology, Copenhagen University Hospital, Rigshospitalet, Copenhagen, Denmark		DBDS GC (Banner)
40	PhD	Erik	Sørensen	Erik.Soerensen@regionh.dk	Department of Clinical Immunology, Copenhagen University Hospital, Rigshospitalet, Copenhagen, Denmark		DBDS GC (Banner)
41	PhD	Kari	Stefansson	kari.stefansson@decode.is	deCODE Genetics, Reykjavik, Iceland		DBDS GC (Banner)
42	PhD	Hreinn	Stefánsson	hreinn.stefansson@decode.is	deCODE Genetics, Reykjavik, Iceland		DBDS GC (Banner)
43	MSc	Jacob	Træholt	jacob.traeholt@regionh.dk	Department of Clinical Immunology, Copenhagen University Hospital, Rigshospitalet, Copenhagen, Denmark		DBDS GC (Banner)
44	PhD	Unnur	Þorsteinsdóttir	Unnur.Thorsteinsdottir@decode.is	deCODE Genetics, Reykjavik, Iceland		DBDS GC (Banner)
45	MD	Mie	Topholm Bruun	mie.topholm.bruun@rsyd.dk	Department of Clinical Immunology, Odense University Hospital, Odense, Denmark		DBDS GC (Banner)
46	PhD	Henrik	Ullum	HEUL@ssi.dk	Statens Serum Institut, Copenhagen, Denmark		DBDS GC (Banner)
47	PhD	Thomas	Werge	thomas.werge@regionh.dk	Institute of Biological Psychiatry, Mental Health Centre, Sct. Hans, Copenhagen University Hospital, Roskilde, Denmark	Department of Clinical Medicine, Faculty of Health and Medical Sciences, University of Copenhagen, Copenhagen, Denmark	DBDS GC (Banner)
