# Supplementary material for: The burden of endometriosis on quality of life in Danish blood donors
Source: Research Square preprint supplement (doi:10.21203/rs.3.rs-6620337/v1), 2025-06-05
Supplement: Supplementary file 3 [file c3d205547a5f3925c2726a4f.xlsx]

## Sheet: Ark1
		n (mild/severe)	Stage I/II endometriosis	Stage III/IV endometriosis	P	FDR
BMI, mean (±SD)		534/419	26,0 (4,6)	25,9 (5,0)	0.78	0.97
Height, mean (±SD)		534/419	168,8 (6,3)	169,4 (6,0)	0.15	0.46
Waist circumference, mean (±SD)		259/223	87,7 (11,2)	86,8 (11,0)	0.44	0.78
Smoking, %		531/419	18.6	11.9	3.81E-3	0.07
Smoking in childhood home, %		281/243	74.4	74.9	0.84	0.97
Age of menarche, mean (±SD)		275/237	13,0 (1,6)	13,0 (1,4)	0.9	0.97
Menstrual cycle length, mean (±SD)		124/107	5,2 (1,7)	4,9 (1,7)	0.24	0.55
Age of onset natural menopause, mean (±SD)		47/33	48,5 (6,1)	47,2 (5,2)	0.55	0.93
Age of onset induced menopause, mean (±SD)		83/67	39,8 (7,7)	40,1 (7,4)	0.89	0.97
Have tried to get pregnant ≥6 months without success, %		166/142	59.4	48.9	0.09	0.42
Have been pregnant, %		166/142	42.2	41.5	0.72	0.97
Nausea during pregnancy, %		94/81	61.2	59.3	0.97	0.97
Do you have a regular stool pattern, yes (%)		142/159	78.9	83.6	0.26	0.57
Problems with stool pattern:
	Bloated, %	136/156	55.9	45.5	0.08	0.42
	Rumbling in the stomach, %	136/157	42.6	42.7	0.92	0.97
	Acid reflux, %	136/157	15.4	12.7	0.33	0.66
	Heartburn, %	138/157	13.8	11.5	0.36	0.67
	Lack of appetite, %	138/156	8.7	4.5	0.12	0.46
	Nausea, %	139/156	18	10.9	0.04	0.3
	Vomiting, %	138/155	1.4	0.6	0.34	0.66
	Pain in the stomach, %	141/155	37.6	22.6	0.01	0.12
	Pain while eating, %	140/156	4.3	0.6	0.04	0.3
	Pain after eating, %	139/156	18	12.2	0.21	0.52
	Pain going to the toilet, %	138/157	15.9	15.9	0.93	0.97
	Diarrhoea, %	139/155	15.1	7.7	0.07	0.42
	Constipation, %	135/155	28.9	12.9	0.000858	0.03
Irritable bowel syndrome, %		116/134	24.1	16.5	0.94	0.97
Lactose intolerance, %		121/137	8.3	3.6	0.14	0.46
Gluten intolerance (celiac disease), %		122/138	1.6	1.4	0.96	0.97
Insomnia, %		258/223	37.6	35.4	0.93	0.97
Daytime fatigue, %		258/222	10.4	10.4	0.78	0.97
Restless legs during sleep, %		117/66	1.7	4.5	0.13	0.46
SF-12 mental component, mean (SD)		476/447	51,8 (7,9)	52,7 (7,4)	0.17	0.48
SF-12 physical component, mean (SD)		476/447	53,4 (6,3)	53,5 (6,7)	0.92	0.97
Perceived stress scale, mean (SD)		256/223	12,8 (5,2)	11,8 (5,6)	0.2	0.52
Depression	MDI score, mean (SD)	204/140	16,3 (4,3)	16,3 (4,3)	0.86	0.97
	classification	204/140	14.7	12.9	0.85	0.97
